# Supplementary material
Source: PubMed Central journal article supplement (PMC2720045)
Supplement: NIHMS75672-supplement-Supp_Data.pdf [file NIHMS75672-supplement-Supp_Data.pdf]

## SUPPORTING INFORMATION

**Fig. S1. DSC thermograms of dimeric PR (dark red), PR<sub>D29N</sub> (dark yellow) and PR<sub>D25N</sub> (orange) in the presence of each of the set of eight inhibitors (28  $\mu$ M) described in the text.**

For comparison, DSC scans of the unliganded proteins are also shown. For experimental conditions and data handling, see Materials and Methods and ref. 17. Data shown have been baseline corrected and normalized to the appropriate protease dimer concentration as described. The curves for PR and PR<sub>D25N</sub> in the absence of inhibitors and in the presence of RPB or DRV are from ref. 17. For PR with DRV, ATV, SQV and APV, biphasic transitions were observed, as discussed in detail for DRV<sup>17</sup>. Results of deconvolution of these overlapping curves (by use of the Origin software provided by MicroCal) are shown as dashed lines. Only the major transitions (colored dashed lines) with the higher  $T_m$  are shown in Fig. 2.

**Fig. S2. Michaelis-Menten kinetic curve for the hydrolysis of H-Pro-Thr-Glu-Phe-[*p*-NO<sub>2</sub>-Phe]-Arg-Leu-OH by 0.13 nM pepsin in 50 mM sodium formate buffer, pH 3, at 28 °C.**

Values of  $K_m$  and  $V_{max}$  were determined from a nonlinear least-squares fit to the data:  $K_m = 93 \pm 16 \mu\text{M}$  and  $V_{max} = 2.08 \pm 0.12 \mu\text{M/s}$ . The line is a theoretical curve based on these values.

**Fig. S3. Logarithmic correlation between published values of ligand dissociation constants ( $K_L$ ) for PR/inhibitor complexes (x-axis; see refs. in Table 1) and calculated values (present work) based on  $T_m$  shifts (y-axis).**

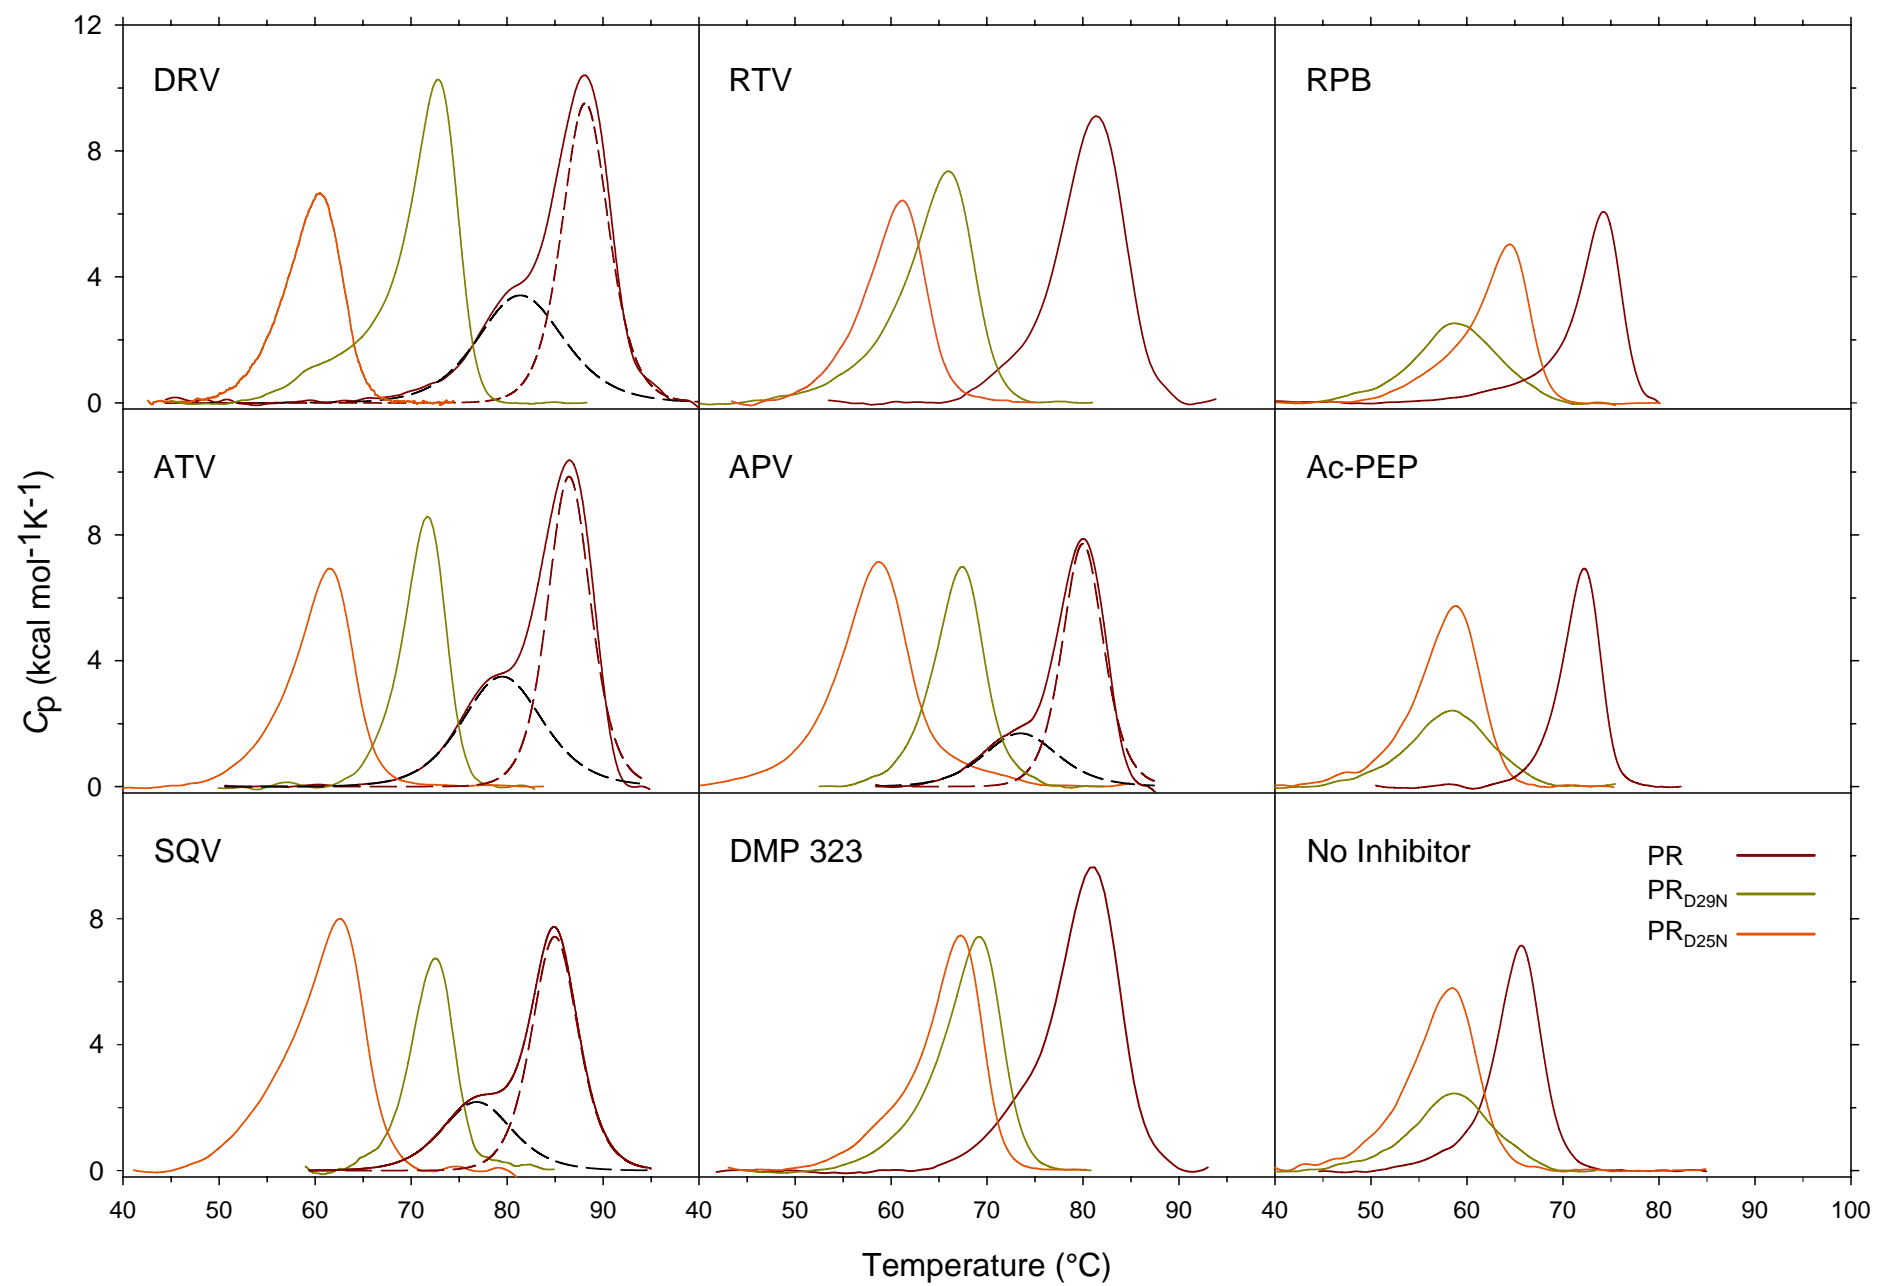

Figure S1

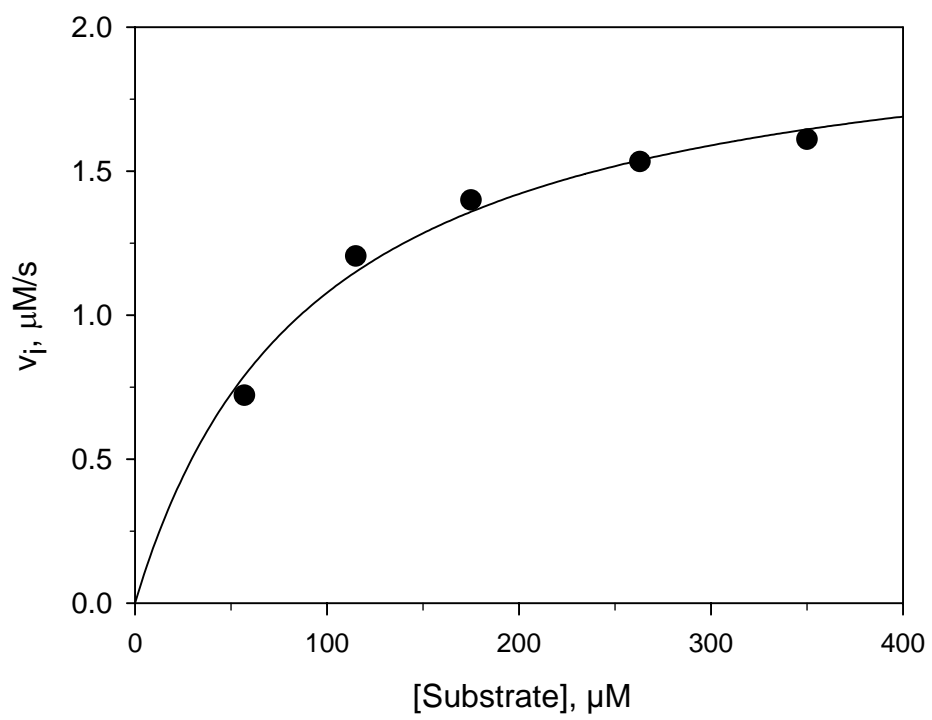

Figure S2

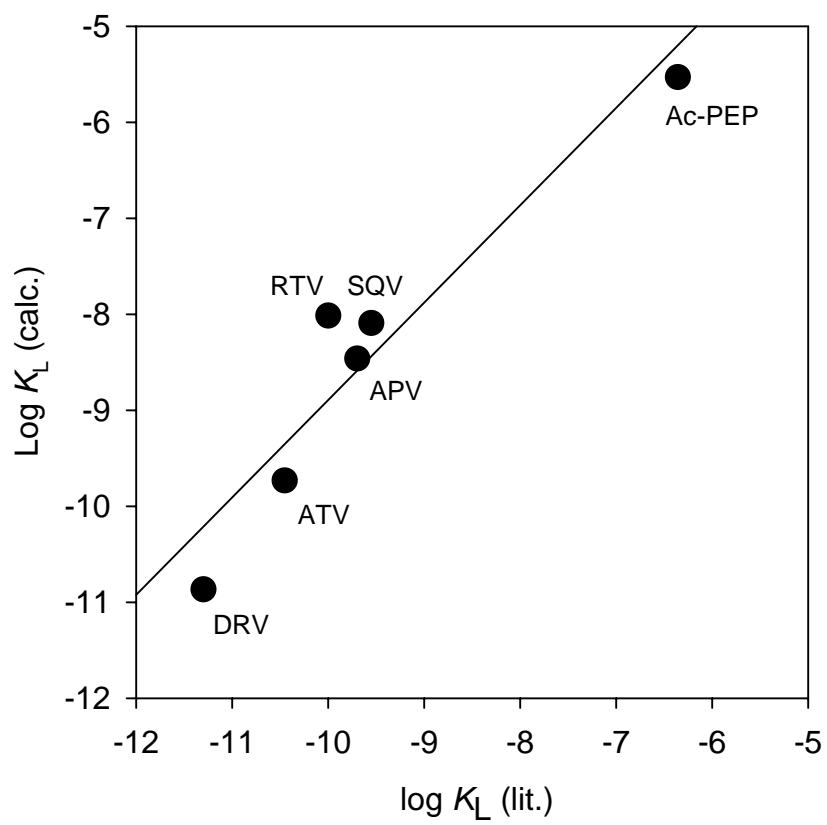

Figure S3
